# Supplementary material
Source: PubMed Central journal article supplement (PMC2896763)
Supplement: mmc1.pdf [file mmc1.pdf]

The American Journal of Human Genetics, Volume 87

**Supplemental Data**

**Mechanisms of Genomic Instabilities Underlying**

**Two Common Fragile-Site-Associated Loci,**

***PARK2* and *DMD*, in Germ Cell and Cancer Cell Lines**

Jun Mitsui, Yuji Takahashi, Jun Goto, Hiroyuki Tomiyama, Shunpei Ishikawa, Hiroyo Yoshino, Narihiro Minami, David I. Smith, Suzanne Lesage, Hiroyuki Aburatani, Ichizo Nishino, Alexis Brice, Nobutaka Hattori, and Shoji Tsuji

### Figure S1. Six Independent Deletions Occurring Simultaneously in One Cancer Cell Line

Scan data of array CGH analysis of one cancer cell line with 6 independent deletions occurring simultaneously. The horizontal axis represents the nucleotide position. The vertical axis represents  $\log_2$  (case/reference signal intensities) on array CGH. Dots of  $\log_2$  (case/reference signal intensities) of more than 0 are shown in red and those of less than 0 are shown in green. Black double arrows represent the length of each deletion.

#### Multiple deletions occurring independently in *PARK2* in one cancer cell line (COLO320)

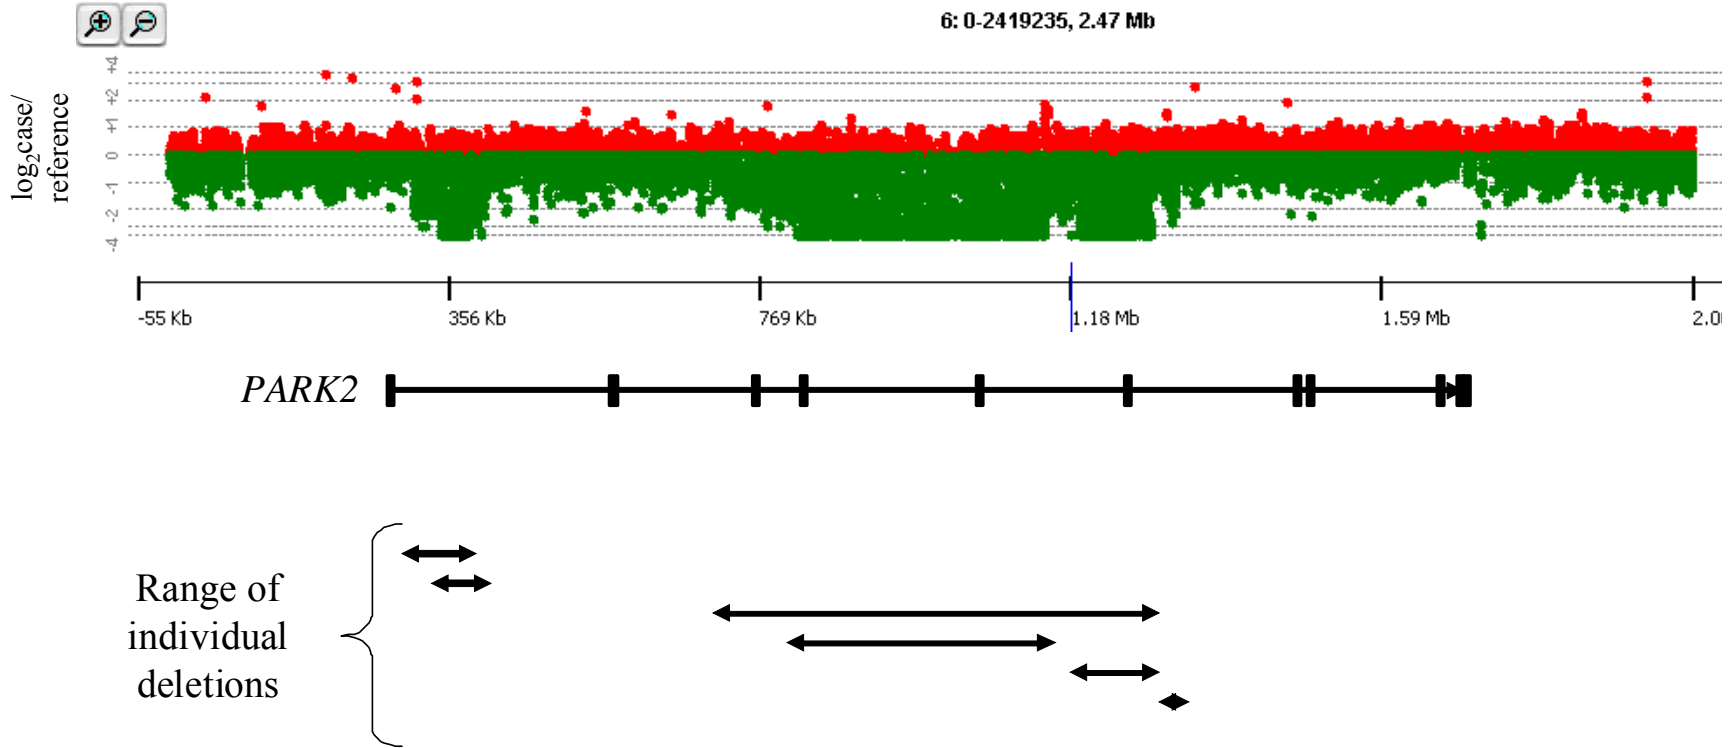

## Figure S2. Definitions of Nucleotide Positions of Breakpoints and Schemes of Three Types of Junction

Scheme 1: junctions with identical sequences on both ends. Scheme 2: junctions without identical sequences on both ends and with inserted sequences. Scheme 3: junctions without identical sequences on both ends and without inserted sequences. In each scheme, nucleotide positions of breakpoints are indicated. The numbers of breakpoints in patients with AR-JP, patients with DMD/BMD, and cancer cell lines are shown below.

### Definitions of nucleotide sequence positions of breakpoints

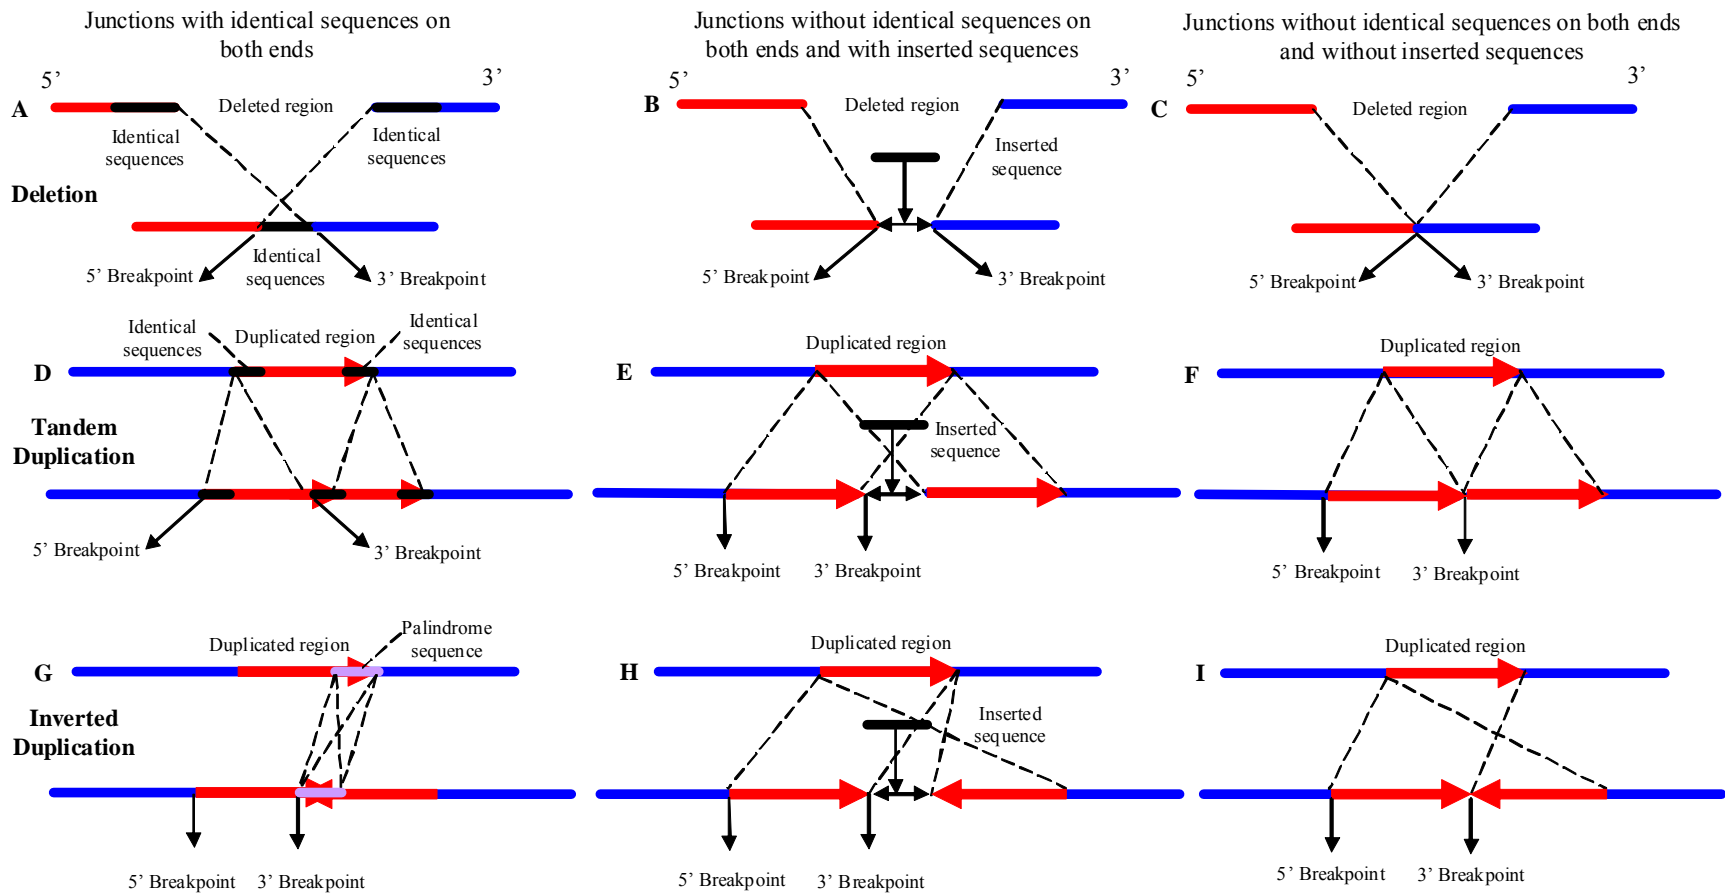

| Sample sources                     | A   | B  | C  | D | E | F | G | H | I | Total |
|------------------------------------|-----|----|----|---|---|---|---|---|---|-------|
| <i>PARK2</i> (Patients with AR-JP) | 94  | 47 | 7  | 9 | 5 | 0 | 0 | 0 | 0 | 162   |
| <i>PARK2</i> (Cancer cell lines)   | 20  | 9  | 2  | 0 | 1 | 0 | 0 | 0 | 0 | 32    |
| <i>DMD</i> (Patients with DMD/BMD) | 120 | 48 | 15 | 9 | 5 | 0 | 0 | 0 | 0 | 197   |
| <i>DMD</i> (Cancer cell lines)     | 3   | 2  | 1  | 0 | 0 | 0 | 0 | 0 | 0 | 6     |

**Figure S3. Scheme of Junctions Forming Partial Chimeric *Alu/Alu* with Inserted Sequences of 7 bp and 12 bp at Their Junctions**

- A. Both ends of breakpoints are embedded in *Alu* sequences and partial chimeric *Alu/Alu* sequences are formed at the breakpoint junctions. The blue and red boxes represent *Alu* sequences of the left and right sides of junctions, respectively. Light gray boxes are deleted *Alu* sequences from chimeric *Alu/Alu* junction segments. There are inserted sequences in the regions of light gray boxes.
- B. Specific sequences are shown below for junctions forming partial chimeric *Alu/Alu* sequences. The nucleotide sequences of the segments are in the same colors as those in part A. Double arrows denote connections of sequences of both sides.

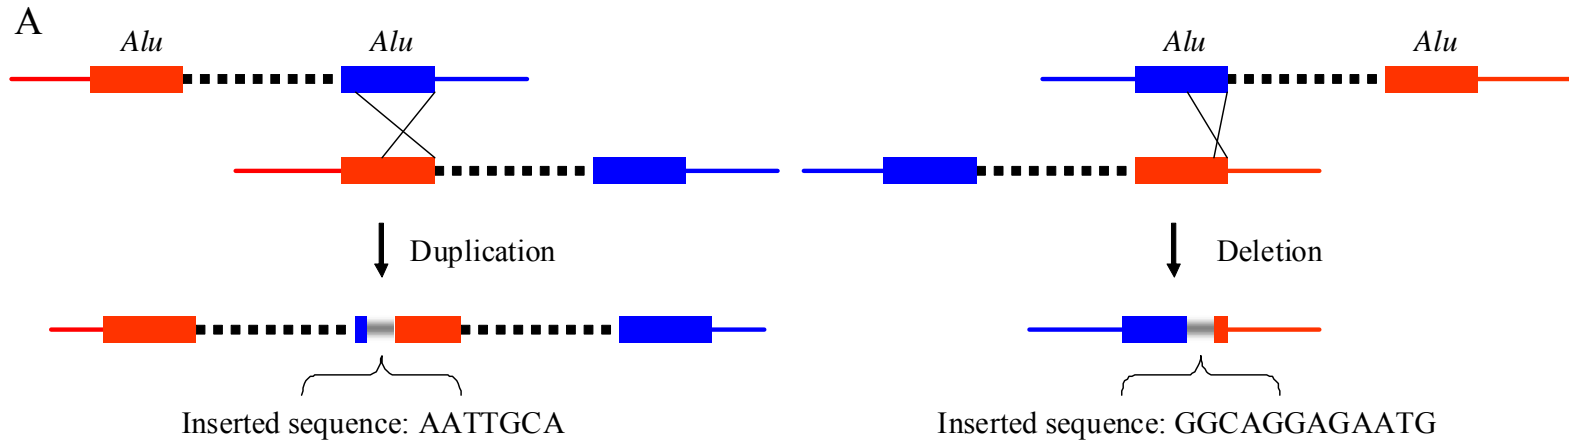

**B** Duplication of “Chromosome 6: 162,253,158 - 162,123,917” with inserted sequence “AATTGCA” at its junction

```

TTTATTTTTTTT<---AATTGCA--->GGCATGATC
|||||
TTTATTTTTTTT<---AATTGCA--->GGCATGATC
|||||
TCGGCTCACTGCAACCTTGGCCTCCCAGGTTCAAGTGATTCTCCTGCCTCAGCCTCCCAA
TCCA<---AATTGCA--->CTGCTCCTGGGTTCAAGCAATTTCTCTGCCTCAGCCTCCCAA
GTAGCTGGGACTACAGGTGCATGCCACCATGCCCTGCTAATTTTTGTATTTTTAGTAGAG
GTAGTTGGGATTACAGGTGCCCGCCATCACACCCGGTAATTTTGTATTTTTAGTAGAG
ATGGGGTTTCGCCATGTTAACCAGGCTGTCTCTAACTCCTGACCTCAGGTGATCCGCC
ACGGTGTTCACCATGTTGACCAGGCTGGTCAAGCAATTTCTCTGCCTCAGGTGATCTGTCC
ACCTCAGCCTCCCAAAGTGCCTGGGATTACAGGCATGAGCCACTGCACCTGGCC
GCCTCGCCCTCCCAAAGTGCCTGGGATTACAGGCATGAGCTACCATGCCTGGCC
    
```

Deletion of “Chromosome X: 32,076,013 - 31,762,546” with inserted sequence “GGCAGGAGAATG” at its junction

```

GGCCGGGTGCGGTGGCTCACGCCTGTAATCCAGCACCTTTGGGAGGCCGAGCGGGCTGA
GGCTGGGCATGGTGGCTCATGCCTATAATCCAGCACCTTTGCGAGGCCGAGGCAGGCGGA
TCA--CGAGGTCAGGAGATCGAGACCATCCTGGCGAACACGGTGAAACCCCGTCTCTACT
TCACCTGAGGTCAGGAGTTTCGAGACCTGCCTGGCCAAATGGTGAAACCCGTCTCTACT
AAAAATATAAAAAATTAGCCTGGCGTGGTAGTGGGTGCCTGTAGTCCAGCTACTCGGGA
AAAAATAT-GAAATGAGCCAGCTGTGGTGGCAGGCCTGTAATCCAGCTACTTGGGA
GGCTGAGGCAGGAGAATGGCGTG<---GGCAGGAGAATG--->GAGATCGC
GGCTGAGGCAGGAGAATCACTTG<---GGCAGGAGAATG--->GAGATCGC
GCCACTGCACTCCAGCCTGGGTGACA-GAGCGAGACTCCATCTCAAAA
GCTGTGCACTCCAGCCTGGGCGACAGGCGAAACTCCGTCTCAAAA
    
```





**Figure S6. Schematic Representation of Physical Relationships between Genes Located in CFSs and large LADs**

Physical maps of genes located in CFSs (*FHIT*, *WWOX*, *GRID2*, and *LARGE*) and chromosomal R/G bands are shown. Box filled with diagonal lines denotes position of LADs. The genes located in CFSs are embedded in large LADs spanning several Mb (approximately 1.7 to 4.7 Mb)

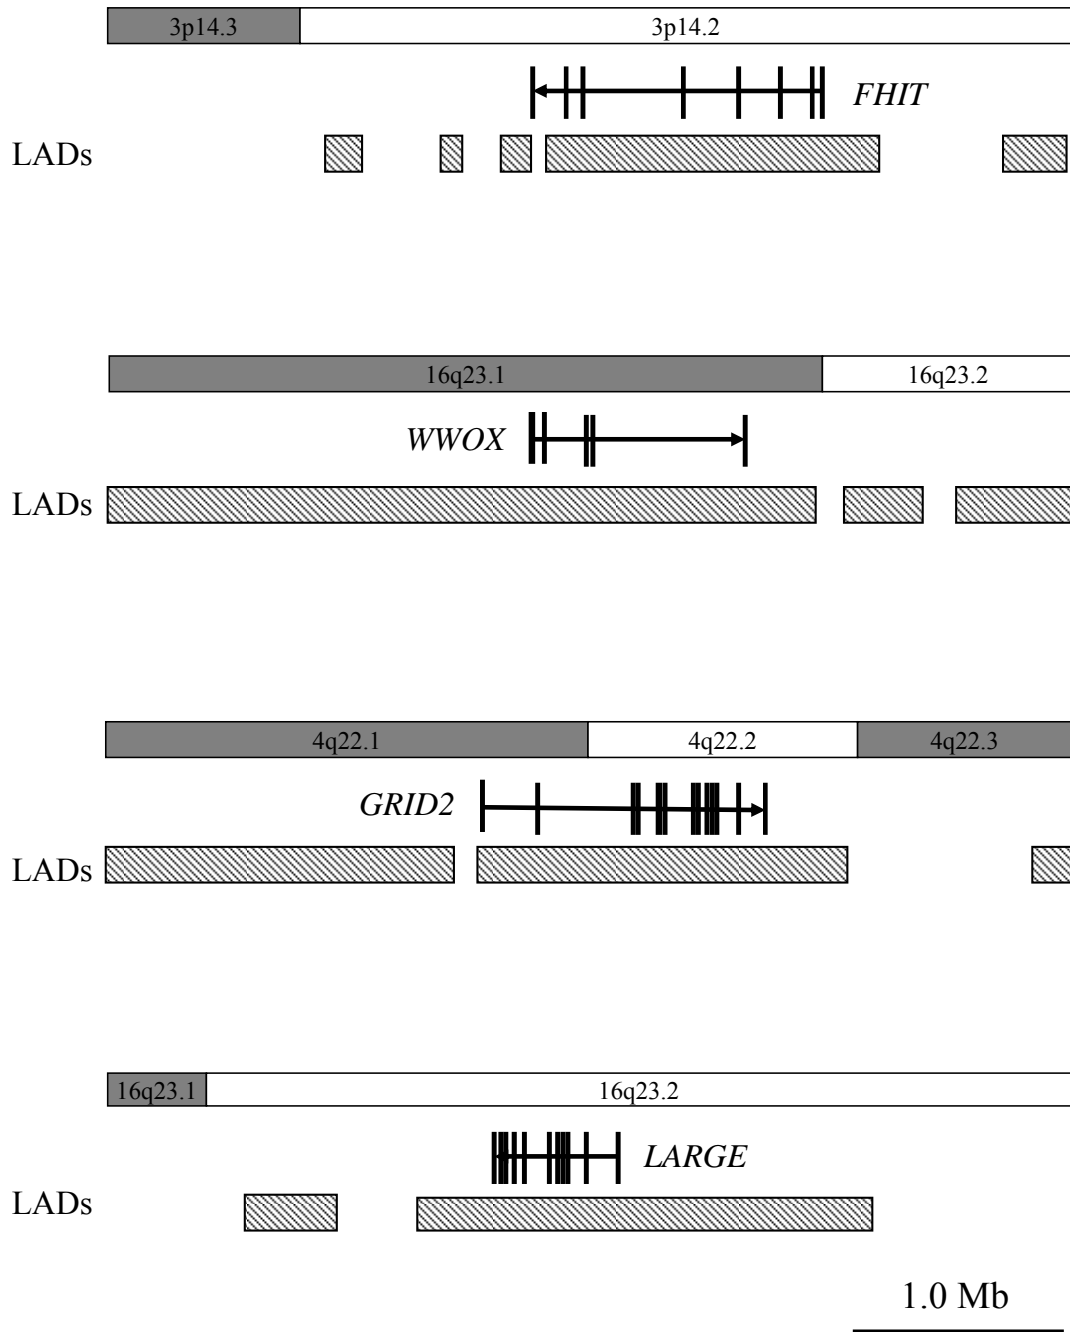

**Table S1. List of Cancer Cell Lines**

| Cell line | Histology         |                 |                   |           |                   |
|-----------|-------------------|-----------------|-------------------|-----------|-------------------|
| 22Rv1     | Prostate cancer   | HLF             | Liver cancer      | PANC-1    | Pancreatic cancer |
| A2058     | Melanoma          | Hs578T          | Breast cancer     | PC-3      | Prostate cancer   |
| A431      | Skin cancer       | HT1080          | Fibrosarcoma      | PK-0      | Pancreatic cancer |
| A549      | Lung cancer       | HT1197          | Bladder cancer    | PK-1      | Pancreatic cancer |
| AGS       | Gastric cancer    | HT1376          | Bladder cancer    | PK-45H    | Pancreatic cancer |
| Alex      | Liver cancer      | HT17            | Liver cancer      | PK-45P    | Pancreatic cancer |
| AZ-521    | Gastric cancer    | HT29            | Colon cancer      | PK-59     | Pancreatic cancer |
| BT-474    | Breast cancer     | HTB49           | Kidney cancer     | PK-8      | Pancreatic cancer |
| BT-483    | Breast cancer     | HuH28           | Bile duct cancer  | RPMI8226  | Myeloma           |
| C33A      | Cervical cancer   | HuH6            | Liver cancer      | RT4       | Bladder cancer    |
| CaCo-2    | Colon cancer      | HuH7            | Liver cancer      | Saos-2    | Osteosarcoma      |
| CAK12     | Kidney cancer     | J82             | Bladder cancer    | SCH       | Choriocarcinoma   |
| CAPAN-1   | Pancreatic cancer | JMSU3           | Bladder cancer    | SF188     | Glioblastoma      |
| COLO320   | Colon cancer      | K-562           | Leukemia          | SF763     | Glioblastoma      |
| DL1       | Colon cancer      | KATOIII         | Gastric cancer    | SJSA-1    | Osteosarcoma      |
| DUI45     | Prostate cancer   | KLM-1           | Pancreatic cancer | SK-BR-3   | Breast cancer     |
| G-361     | Melanoma          | LNCaP clone FGC | Prostate cancer   | SK-MEL-28 | Melanoma          |
| H1299     | Lung cancer       | LOVO            | Colon cancer      | SKOV8     | Ovarian cancer    |
| H157      | Lung cancer       | MCF7            | Breast cancer     | SW480     | Colon cancer      |
| H2009     | Lung cancer       | MDA PCA 2b      | Prostate cancer   | T-47D     | Breast cancer     |
| H209      | Lung cancer       | MDA468          | Cervical cancer   | T84       | Colon cancer      |
| H2122     | Lung cancer       | MDA-MB-175-VII  | Breast cancer     | T98G      | Glioblastoma      |
| H2347     | Lung cancer       | MDA-MB-231      | Breast cancer     | TCC-SUP   | Bladder cancer    |
| H292      | Lung cancer       | MDA-MB-361      | Breast cancer     | TCS       | Uterus cancer     |
| H460      | Lung cancer       | MDA-MB-415      | Breast cancer     | TE10      | Esophagus cancer  |
| H522      | Lung cancer       | MDA-MB-435S     | Breast cancer     | TE11      | Esophagus cancer  |
| HCC1008   | Breast cancer     | ME180           | Uterus cancer     | TE14      | Esophagus cancer  |
| HCC1143   | Breast cancer     | MKN-1           | Gastric cancer    | TE4       | Esophagus cancer  |
| HCC1187   | Breast cancer     | MKN-45          | Gastric cancer    | TE6       | Esophagus cancer  |
| HCC1395   | Breast cancer     | MKN-45          | Gastric cancer    | TE8       | Esophagus cancer  |
| HCC1599   | Breast cancer     | NCI-H1395       | Lung cancer       | TE9       | Esophagus cancer  |
| HCC1937   | Breast cancer     | NCI-H2126       | Lung cancer       | TGW       | Neuroblastoma     |
| HCC1954   | Breast cancer     | NCI-H358        | Lung cancer       | THP-1     | Leukemia          |
| HCC202    | Breast cancer     | NCI-H526        | Lung cancer       | TOV-112D  | Ovarian cancer    |
| HCC2157   | Breast cancer     | NCI-H69         | Lung cancer       | U343      | Glioblastoma      |
| HCC2218   | Breast cancer     | NMCG1           | Glioblastoma      | U87       | Glioblastoma      |
| HCC38     | Breast cancer     | NUGC3           | Gastric cancer    | UACC812   | Breast cancer     |
| HCT116    | Colon cancer      | NUGC4           | Gastric cancer    | UACC893   | Breast cancer     |
| HepG2     | Liver cancer      | OCUM-2MD3       | Gastric cancer    | VMRC-RCZ  | Kidney cancer     |
| HL60      | Leukemia          | OV167           | Ovarian cancer    | WM-115    | Melanoma          |
| HLC-1     | Lung cancer       | OV202           | Ovarian cancer    | ZR-75-1   | Breast cancer     |
|           |                   | OVCAR5          | Ovarian cancer    | ZR-75-30  | Breast cancer     |



**Table S2. Results of Sequence Motif Analyses**

| Motif name                                    | Motif sequence                 | Breakpoint regions   |       |                    |       | Control sequences |       |
|-----------------------------------------------|--------------------------------|----------------------|-------|--------------------|-------|-------------------|-------|
|                                               |                                | <i>PARK2</i> (n=384) | %     | <i>DMD</i> (n=406) | %     | (n=5,000)         | %     |
| X-element <i>E.coli</i>                       | GCTGGTGG                       | 5                    | 1.3   | 2                  | 0.5   | 36                | 0.7   |
| Ade6-M26                                      | ATGACGT                        | 2                    | 0.5   | 5                  | 1.2   | 26                | 0.5   |
| ARS consensus <i>S. cerevisiae</i>            | WTTTATRITTW                    | 7                    | 1.8   | 9                  | 2.2   | 96                | 1.9   |
| ARS consensus <i>S. pombe</i>                 | WRTTATTTAW                     | 4                    | 1.0   | 2                  | 0.5   | 100               | 2.0   |
| Consensus scaffold attachment region 1        | AATAAAAYAAA                    | 7                    | 1.8   | 8                  | 2.0   | 198               | 4.0   |
| Consensus scaffold attachment region 2        | TTWTWTTWTT                     | 207                  | 53.9  | 249                | 61.3  | 3362              | 67.2  |
| Consensus scaffold attachment region 3        | WADAWAYAWW                     | 181                  | 47.1  | 236                | 58.1  | 2786              | 55.7  |
| Consensus scaffold attachment region 4        | TWWTDTTWWW                     | 393                  | 102.3 | 469                | 115.5 | 6292              | 125.8 |
| Deletion hotspot consensus                    | TGRRKM                         | 728                  | 189.6 | 783                | 192.9 | 9626              | 192.5 |
| DNA polymerase arrest site                    | WGGAG                          | 458                  | 119.3 | 349                | 86.0  | 5962              | 119.2 |
| DNA polymerase a frameshift hotspot 1         | TCCCCC                         | 38                   | 9.9   | 30                 | 7.4   | 308               | 6.2   |
| DNA polymerase a frameshift hotspot 2         | CTGGCG                         | 9                    | 2.3   | 6                  | 1.5   | 68                | 1.4   |
| DNA polymerase b frameshift hotspot 1         | ACCCWR                         | 173                  | 45.1  | 146                | 36.0  | 2030              | 40.6  |
| DNA polymerase a/b frameshift hotspot 1       | ACCCCA                         | 28                   | 7.3   | 49                 | 12.1  | 476               | 9.5   |
| DNA polymerase a/b frameshift hotspot 2       | TGGNGT                         | 156                  | 40.6  | 145                | 35.7  | 2244              | 44.9  |
| <i>Drosophila</i> topoisomerase II consensus  | GTNWAYATTNATNNR                | 4                    | 1.0   | 2                  | 0.5   | 20                | 0.4   |
| Heptamer recombination signal                 | CACAGTG                        | 20                   | 5.2   | 15                 | 3.7   | 268               | 5.4   |
| Human hypervariable minisatellites sequence 1 | GGAGGTGGGCAGGARG               | 0                    | 0.0   | 0                  | 0.0   | 0                 | 0.0   |
| Human hypervariable minisatellites sequence 2 | AGAGGTGGGCAGGTGG               | 0                    | 0.0   | 0                  | 0.0   | 0                 | 0.0   |
| Human minisatellites core sequence            | GGGCAGGARG                     | 2                    | 0.5   | 0                  | 0.0   | 8                 | 0.2   |
| Human replication origin consensus            | WAWTTDDWWDHWGWHMAWTT           | 0                    | 0.0   | 0                  | 0.0   | 8                 | 0.2   |
| Human minisatellites conserved sequence       | GCWGGWGG                       | 12                   | 3.1   | 10                 | 2.5   | 252               | 5.0   |
| Ig heavy chain class switch repeat 1          | GAGCT                          | 144                  | 37.5  | 127                | 31.3  | 1702              | 34.0  |
| Ig heavy chain class switch repeat 2          | GGGCT                          | 101                  | 26.3  | 77                 | 19.0  | 1420              | 28.4  |
| Ig heavy chain class switch repeat 3          | GGGGT                          | 95                   | 24.7  | 90                 | 22.2  | 1238              | 24.8  |
| Ig heavy chain class switch repeat 4          | TGGGG                          | 144                  | 37.5  | 150                | 36.9  | 2108              | 42.2  |
| Ig heavy chain class switch repeat 5          | TGAGC                          | 173                  | 45.1  | 143                | 35.2  | 2252              | 45.0  |
| LTR-IS motif                                  | TGGAAATCCCC                    | 0                    | 0.0   | 0                  | 0.0   | 2                 | 0.0   |
| Mariner transposon-like element               | GAAAATGAAGCTATTTACCCAGGA       | 0                    | 0.0   | 0                  | 0.0   | 0                 | 0.0   |
| Murine MHC recombination hotspot              | CAGRCAGR                       | 18                   | 4.7   | 16                 | 3.9   | 288               | 5.8   |
| Murine parvovirus recombination hotspot       | CTWTTY                         | 334                  | 87.0  | 405                | 99.8  | 4894              | 97.9  |
| Nonamer recombination signal                  | ACAAAAACC                      | 1                    | 0.3   | 1                  | 0.2   | 6                 | 0.1   |
| Pur binding site                              | GGNNGAGGGAGARRRR               | 0                    | 0.0   | 1                  | 0.2   | 4                 | 0.1   |
| Recombination hotspot                         | CCNCCNTNCCNC                   | 10                   | 2.6   | 4                  | 1.0   | 110               | 2.2   |
| Retrotransposon                               | TCATACACCACGCAGGGGTAGAGGACT    | 0                    | 0.0   | 0                  | 0.0   | 0                 | 0.0   |
| Translin binding site 1                       | ATGCAG                         | 42                   | 10.9  | 48                 | 11.8  | 660               | 13.2  |
| Translin binding site 2                       | GCCWSSW                        | 29                   | 7.6   | 25                 | 6.2   | 458               | 9.2   |
| Vaccinia topoisomerase I consensus            | YCCTT                          | 368                  | 95.8  | 419                | 103.2 | 5186              | 103.7 |
| Vertebrate topoisomerase II consensus         | RNYNNCNGYNGKTNINY              | 3                    | 0.8   | 3                  | 0.7   | 82                | 1.6   |
| XY32 homopurine-pyrimidine H-palindrome motif | AAGGGAGAARGGGTATAGGGRAAGAGGGAA | 0                    | 0.0   | 0                  | 0.0   | 0                 | 0.0   |

**Table S3. Result of the Analyses of AT Content and Flexibility Peak**

| Region of interest           | Position                              | AT content (%) | Average twist angle (degree) | Flexibility peak (peaks/Mb) <sup>a)</sup> | Unified peak (peaks/Mb) <sup>b)</sup> | Cluster of peaks (peaks/Mb) <sup>c)</sup> |
|------------------------------|---------------------------------------|----------------|------------------------------|-------------------------------------------|---------------------------------------|-------------------------------------------|
|                              | chromosome 6: 159,870,000-160,370,000 | 56.70          | 10.66                        | 40                                        | 26                                    | 4                                         |
|                              | chromosome 6: 160,370,000-160,870,000 | 56.90          | 10.70                        | 32                                        | 18                                    | 4                                         |
|                              | chromosome 6: 160,870,000-161,370,000 | 59.43          | 10.81                        | 44                                        | 36                                    | 4                                         |
|                              | chromosome 6: 161,370,000-161,870,000 | 56.98          | 10.68                        | 52                                        | 32                                    | 8                                         |
|                              | chromosome 6: 161,870,000-162,370,000 | 59.16          | 10.85                        | 74                                        | 44                                    | 10                                        |
| Breakpoint clustering region | chromosome 6: 162,370,000-162,870,000 | 60.66          | 10.90                        | 50                                        | 24                                    | 0                                         |
|                              | chromosome 6: 162,870,000-163,370,000 | 61.86          | 10.96                        | 64                                        | 32                                    | 8                                         |
|                              | chromosome 6: 163,370,000-163,870,000 | 58.61          | 10.74                        | 32                                        | 24                                    | 4                                         |
|                              | chromosome 6: 163,870,000-164,370,000 | 57.59          | 10.72                        | 36                                        | 26                                    | 4                                         |
|                              | chromosome 6: 164,370,000-164,870,000 | 60.67          | 10.87                        | 104                                       | 46                                    | 12                                        |
|                              | chromosome 6: 164,870,000-165,370,000 | 62.64          | 11.03                        | 88                                        | 50                                    | 12                                        |
|                              | chromosome X: 29,000,000-29,500,000   | 63.70          | 11.08                        | 116                                       | 56                                    | 18                                        |
|                              | chromosome X: 29,500,000-30,000,000   | 63.22          | 11.07                        | 72                                        | 50                                    | 10                                        |
|                              | chromosome X: 30,000,000-30,500,000   | 61.32          | 10.92                        | 36                                        | 24                                    | 4                                         |
|                              | chromosome X: 30,500,000-31,000,000   | 59.65          | 10.81                        | 56                                        | 38                                    | 6                                         |
|                              | chromosome X: 31,000,000-31,500,000   | 61.19          | 10.89                        | 34                                        | 30                                    | 0                                         |
| Breakpoint clustering region | chromosome X: 31,500,000-32,000,000   | 63.96          | 11.07                        | 52                                        | 40                                    | 2                                         |
|                              | chromosome X: 32,000,000-32,500,000   | 64.69          | 11.15                        | 100                                       | 62                                    | 14                                        |
|                              | chromosome X: 32,500,000-33,000,000   | 63.76          | 11.12                        | 80                                        | 56                                    | 8                                         |
|                              | chromosome X: 33,000,000-33,500,000   | 64.18          | 11.13                        | 100                                       | 66                                    | 18                                        |
|                              | chromosome X: 33,500,000-34,000,000   | 64.44          | 11.11                        | 78                                        | 42                                    | 12                                        |
|                              | chromosome X: 34,000,000-34,500,000   | 63.77          | 11.08                        | 82                                        | 50                                    | 12                                        |

<sup>a)</sup> Average twist angles  $\geq 13.7$  were considered.

<sup>b)</sup> Distance between adjacent peaks  $\leq 100$  bp was unified.

<sup>c)</sup> Equal or more than 3 unified peaks whose distance between adjacent unified peaks are smaller than 5,000 bp.
